# Supplementary material for: Network meta-analysis of multiple doses of vonoprazan for the treatment of erosive esophagitis
Source: Atypon-hosted journal article supplement (doi:10.57264/cer-2022-0165), 2023-07-20
Supplement: supplementary table 1.docx [file supplementary%20table%201.docx]

**Search query of Pubmed**

| Search number | Query | Results |
| --- | --- | --- |
| 3 | ((((corrosive esophagitis) OR (erosive esophagitis)) OR (caustic esophagitis)) OR (peptic esophagitis)) AND (((((Vonoprazan) OR (VPZ)) OR (TAK-438)) OR (TAK438)) OR (TAK 438)) | 49 |
| 2 | ((((Vonoprazan) OR (VPZ)) OR (TAK-438)) OR (TAK438)) OR (TAK 438) | 357 |
| 1 | (((corrosive esophagitis) OR (erosive esophagitis)) OR (caustic esophagitis)) OR (peptic esophagitis) | 11,059 |

**Search query of Embase**

.......................................................

No. Query Results Results

#4. #3 AND [embase]/lim 35

#3. #1 AND #2 35

#2. vonoprazan:ti,ab,kw OR vpz:ti,ab,kw OR 582

tak438:ti,ab,kw OR 'tak 438':ti,ab,kw

#1. 'corrosive esophagitis':ti,ab,kw OR 'erosive 2,948

esophagitis':ti,ab,kw OR 'caustic

esophagitis':ti,ab,kw OR 'peptic

esophagitis':ti,ab,kw

.......................................................

**Search query of Cochrane library**

ID Search Hits

#1 (corrosive esophagitis):ti,ab,kw OR (erosive esophagitis):ti,ab,kw OR (caustic esophagitis):ti,ab,kw OR (peptic esophagitis):ti,ab,kw 1035

#2 (Vonoprazan):ti,ab,kw OR (VPZ):ti,ab,kw OR (TAK-438):ti,ab,kw OR (TAK438):ti,ab,kw OR (TAK 438):ti,ab,kw 289

#3 #1 and #2 43
